# Supplementary material for: Can Human Embryonic Stem Cell-Derived Stromal Cells Serve a Starting Material for Myoblasts?
Source: Hindawi journal article supplement (doi:10.1155/2017/7541734), 2017-01-01
Supplement: f1 [file 7541734.f1.pdf]

Supplemental Table 1. List of the muscle-associated genes

| Systematic     | Common   | Description                                                               |
|----------------|----------|---------------------------------------------------------------------------|
| A_23_P368691   | ABCC9    | ATP-binding cassette, sub-family C (CFTR/MRP), member 9                   |
| A_24_P178503   | ABCC9    | ATP-binding cassette, sub-family C (CFTR/MRP), member 9                   |
| A_23_P307310   | ACAN     | aggrecan                                                                  |
| A_33_P3500167  | ACAN     | aggrecan                                                                  |
| A_33_P3229288  | ACE      | angiotensin I converting enzyme                                           |
| A_23_P252981   | ACE2     | angiotensin I converting enzyme 2                                         |
| A_33_P3236382  | ACTC1    | actin, alpha, cardiac muscle 1                                            |
| A_23_P79221    | ACVR1    | activin A receptor, type I                                                |
| A_33_P3360665  | ACVR1    | activin A receptor, type I                                                |
| A_23_P374082   | ADAM19   | ADAM metalloproteinase domain 19                                          |
| A_23_P81369    | ADAM19   | ADAM metalloproteinase domain 19                                          |
| A_23_P49816    | ADAP2    | ArfGAP with dual PH domains 2                                             |
| A_22_P00012098 | ADRA1A   | adrenoceptor alpha 1A                                                     |
| A_23_P8938     | ADRA1A   | adrenoceptor alpha 1A                                                     |
| A_33_P3377194  | ADRA1A   | adrenoceptor alpha 1A                                                     |
| A_33_P3310189  | ADRB1    | adrenoceptor beta 1                                                       |
| A_33_P3384392  | ADRBK1   | adrenergic, beta, receptor kinase 1                                       |
| A_23_P115261   | AGT      | angiotensinogen (serpin peptidase inhibitor, clade A, member 8)           |
| A_23_P62309    | AGTR2    | angiotensin II receptor, type 2                                           |
| A_33_P3376493  | AGTR2    | angiotensin II receptor, type 2                                           |
| A_23_P368126   | AHCYL1   | adenosylhomocysteinase-like 1                                             |
| A_24_P11307    | AHCYL1   | adenosylhomocysteinase-like 1                                             |
| A_23_P70746    | AHI1     | Abelson helper integration site 1                                         |
| A_24_P38143    | AHI1     | Abelson helper integration site 1                                         |
| A_24_P142095   | AKAP13   | A kinase (PRKA) anchor protein 13                                         |
| A_23_P14351    | AKAP6    | A kinase (PRKA) anchor protein 6                                          |
| A_23_P123108   | AKAP9    | A kinase (PRKA) anchor protein 9                                          |
| A_23_P309261   | AKAP9    | A kinase (PRKA) anchor protein 9                                          |
| A_33_P3380196  | AKAP9    | A kinase (PRKA) anchor protein 9                                          |
| A_33_P3380211  | AKAP9    | A kinase (PRKA) anchor protein 9                                          |
| A_33_P3210099  | ALPK3    | alpha-kinase 3                                                            |
| A_23_P133068   | ANK2     | ankyrin 2, neuronal                                                       |
| A_33_P3287967  | ANK2     | ankyrin 2, neuronal                                                       |
| A_23_P161218   | ANKRD1   | ankyrin repeat domain 1 (cardiac muscle)                                  |
| A_21_P0000813  | APELA    | apelin receptor early endogenous ligand                                   |
| A_22_P00002896 | APELA    | apelin receptor early endogenous ligand                                   |
| A_22_P00002897 | APELA    | apelin receptor early endogenous ligand                                   |
| A_33_P6462199  | APELA    | apelin receptor early endogenous ligand                                   |
| A_23_P318860   | APLNR    | apelin receptor                                                           |
| A_24_P416961   | ARVCF    | armadillo repeat gene deleted in velocardiofacial syndrome                |
| A_33_P3236993  | ARVCF    | armadillo repeat gene deleted in velocardiofacial syndrome                |
| A_23_P216094   | ASPH     | aspartate beta-hydroxylase                                                |
| A_24_P18105    | ASPH     | aspartate beta-hydroxylase                                                |
| A_24_P295245   | ASPH     | aspartate beta-hydroxylase                                                |
| A_24_P128145   | ATF2     | activating transcription factor 2                                         |
| A_24_P246467   | ATF2     | activating transcription factor 2                                         |
| A_23_P1072     | ATP1A1   | ATPase, Na <sup>+</sup> /K <sup>+</sup> transporting, alpha 1 polypeptide |
| A_33_P3384272  | ATP1A1   | ATPase, Na <sup>+</sup> /K <sup>+</sup> transporting, alpha 1 polypeptide |
| A_23_P148879   | ATP1A2   | ATPase, Na <sup>+</sup> /K <sup>+</sup> transporting, alpha 2 polypeptide |
| A_33_P3359771  | ATP1A2   | ATPase, Na <sup>+</sup> /K <sup>+</sup> transporting, alpha 2 polypeptide |
| A_33_P3283669  | ATP1A3   | ATPase, Na <sup>+</sup> /K <sup>+</sup> transporting, alpha 3 polypeptide |
| A_23_P160177   | ATP1A4   | ATPase, Na <sup>+</sup> /K <sup>+</sup> transporting, alpha 4 polypeptide |
| A_24_P307626   | ATP1A4   | ATPase, Na <sup>+</sup> /K <sup>+</sup> transporting, alpha 4 polypeptide |
| A_23_P62932    | ATP1B1   | ATPase, Na <sup>+</sup> /K <sup>+</sup> transporting, beta 1 polypeptide  |
| A_24_P31275    | ATP1B2   | ATPase, Na <sup>+</sup> /K <sup>+</sup> transporting, beta 2 polypeptide  |
| A_23_P68007    | ATP1B3   | ATPase, Na <sup>+</sup> /K <sup>+</sup> transporting, beta 3 polypeptide  |
| A_23_P72462    | ATP2A1   | ATPase, Ca <sup>++</sup> transporting, cardiac muscle, fast twitch 1      |
| A_33_P3342720  | ATP2A1   | ATPase, Ca <sup>++</sup> transporting, cardiac muscle, fast twitch 1      |
| A_33_P3342830  | ATP2A1   | ATPase, Ca <sup>++</sup> transporting, cardiac muscle, fast twitch 1      |
| A_24_P141786   | ATP2A2   | ATPase, Ca <sup>++</sup> transporting, cardiac muscle, slow twitch 2      |
| A_24_P73290    | ATP2A2   | ATPase, Ca <sup>++</sup> transporting, cardiac muscle, slow twitch 2      |
| A_23_P207632   | ATP2A3   | ATPase, Ca <sup>++</sup> transporting, ubiquitous                         |
| A_24_P202319   | ATP2A3   | ATPase, Ca <sup>++</sup> transporting, ubiquitous                         |
| A_33_P3267185  | ATP2B1   | ATPase, Ca <sup>++</sup> transporting, plasma membrane 1                  |
| A_33_P3267186  | ATP2B1   | ATPase, Ca <sup>++</sup> transporting, plasma membrane 1                  |
| A_23_P18152    | ATP2B2   | ATPase, Ca <sup>++</sup> transporting, plasma membrane 2                  |
| A_33_P3393851  | ATP2B2   | ATPase, Ca <sup>++</sup> transporting, plasma membrane 2                  |
| A_33_P3400973  | ATP2B2   | ATPase, Ca <sup>++</sup> transporting, plasma membrane 2                  |
| A_23_P337642   | ATP2B3   | ATPase, Ca <sup>++</sup> transporting, plasma membrane 3                  |
| A_33_P3369146  | ATP2B3   | ATPase, Ca <sup>++</sup> transporting, plasma membrane 3                  |
| A_23_P11841    | ATP2B4   | ATPase, Ca <sup>++</sup> transporting, plasma membrane 4                  |
| A_24_P405205   | ATP2B4   | ATPase, Ca <sup>++</sup> transporting, plasma membrane 4                  |
| A_33_P3327200  | ATP2B4   | ATPase, Ca <sup>++</sup> transporting, plasma membrane 4                  |
| A_23_P213385   | BASP1    | brain abundant, membrane attached signal protein 1                        |
| A_23_P215449   | BAZ1B    | bromodomain adjacent to zinc finger domain, 1B                            |
| A_33_P3321577  | BAZ1B    | bromodomain adjacent to zinc finger domain, 1B                            |
| A_23_P99967    | BBS4     | Bardet-Biedl syndrome 4                                                   |
| A_23_P252642   | BBS5     | Bardet-Biedl syndrome 5                                                   |
| A_23_P5785     | BBS5     | Bardet-Biedl syndrome 5                                                   |
| A_23_P252913   | BBS7     | Bardet-Biedl syndrome 7                                                   |
| A_23_P159741   | BCOR     | BCL6 corepressor                                                          |
| A_23_P405707   | BCOR     | BCL6 corepressor                                                          |
| A_33_P3267760  | BCOR     | BCL6 corepressor                                                          |
| A_23_P131588   | BMP10    | bone morphogenetic protein 10                                             |
| A_33_P3237150  | BMP2     | bone morphogenetic protein 2                                              |
| A_23_P54144    | BMP4     | bone morphogenetic protein 4                                              |
| A_19_P00805548 | BMPR1A   | bone morphogenetic protein receptor, type IA                              |
| A_23_P1431     | BMPR1A   | bone morphogenetic protein receptor, type IA                              |
| A_24_P527404   | BMPR1A   | bone morphogenetic protein receptor, type IA                              |
| A_33_P3219256  | BMPR1A   | bone morphogenetic protein receptor, type IA                              |
| A_32_P181638   | BVES     | blood vessel epicardial substance                                         |
| A_32_P468341   | C1orf127 | chromosome 1 open reading frame 127                                       |
| A_24_P371399   | C3orf58  | chromosome 3 open reading frame 58                                        |
| A_23_P373031   | CACNA1C  | calcium channel, voltage-dependent, L type, alpha 1C subunit              |
| A_33_P3249394  | CACNA1C  | calcium channel, voltage-dependent, L type, alpha 1C subunit              |
| A_33_P3297580  | CACNA1C  | calcium channel, voltage-dependent, L type, alpha 1C subunit              |
| A_33_P3825869  | CACNA1C  | calcium channel, voltage-dependent, L type, alpha 1C subunit              |
| A_23_P365767   | CACNA1D  | calcium channel, voltage-dependent, L type, alpha 1D subunit              |
| A_23_P148327   | CACNA1F  | calcium channel, voltage-dependent, L type, alpha 1F subunit              |
| A_23_P107247   | CACNA1G  | calcium channel, voltage-dependent, T type, alpha 1G subunit              |
| A_33_P3261418  | CACNA1G  | calcium channel, voltage-dependent, T type, alpha 1G subunit              |
| A_33_P3218960  | CACNA1H  | calcium channel, voltage-dependent, T type, alpha 1H subunit              |
| A_23_P85765    | CACNA1S  | calcium channel, voltage-dependent, L type, alpha 1S subunit              |
| A_23_P82379    | CACNA2D1 | calcium channel, voltage-dependent, alpha 2/delta subunit 1               |
| A_33_P3232478  | CACNA2D1 | calcium channel, voltage-dependent, alpha 2/delta subunit 1               |
| A_23_P346900   | CACNA2D2 | calcium channel, voltage-dependent, alpha 2/delta subunit 2               |
| A_24_P402825   | CACNA2D3 | calcium channel, voltage-dependent, alpha 2/delta subunit 3               |
| A_33_P3373259  | CACNA2D3 | calcium channel, voltage-dependent, alpha 2/delta subunit 3               |
| A_23_P353014   | CACNA2D4 | calcium channel, voltage-dependent, alpha 2/delta subunit 4               |

| Systematic     | Common  | Description                                                                       |
|----------------|---------|-----------------------------------------------------------------------------------|
| A_33_P3285275  | CACNB2  | calcium channel, voltage-dependent, beta 2 subunit                                |
| A_33_P3285277  | CACNB2  | calcium channel, voltage-dependent, beta 2 subunit                                |
| A_33_P3363271  | CACNB2  | calcium channel, voltage-dependent, beta 2 subunit                                |
| A_23_P204016   | CACNB3  | calcium channel, voltage-dependent, beta 3 subunit                                |
| A_33_P3221989  | CACNB4  | calcium channel, voltage-dependent, beta 4 subunit                                |
| A_23_P89302    | CACNG1  | calcium channel, voltage-dependent, gamma subunit 1                               |
| A_22_P00003226 | CACNG2  | calcium channel, voltage-dependent, gamma subunit 2                               |
| A_23_P84000    | CACNG2  | calcium channel, voltage-dependent, gamma subunit 2                               |
| A_23_P66180    | CACNG3  | calcium channel, voltage-dependent, gamma subunit 3                               |
| A_24_P70303    | CACNG4  | calcium channel, voltage-dependent, gamma subunit 4                               |
| A_33_P3341299  | CACNG4  | calcium channel, voltage-dependent, gamma subunit 4                               |
| A_23_P414328   | CACNG5  | calcium channel, voltage-dependent, gamma subunit 5                               |
| A_23_P501933   | CACNG6  | calcium channel, voltage-dependent, gamma subunit 6                               |
| A_23_P4782     | CACNG7  | calcium channel, voltage-dependent, gamma subunit 7                               |
| A_24_P365349   | CACNG7  | calcium channel, voltage-dependent, gamma subunit 7                               |
| A_23_P420218   | CACNG8  | calcium channel, voltage-dependent, gamma subunit 8                               |
| A_24_P313186   | CALM1   | calmodulin 1 (phosphorylase kinase, delta)                                        |
| A_23_P144458   | CAMK2D  | calcium/calmodulin-dependent protein kinase II delta                              |
| A_32_P47988    | CAMK2D  | calcium/calmodulin-dependent protein kinase II delta                              |
| A_23_P365189   | CAMTA2  | calmodulin binding transcription activator 2                                      |
| A_23_P12572    | CASP7   | caspace 7, apoptosis-related cysteine peptidase                                   |
| A_23_P173      | CASQ1   | calsequestrin 1 (fast-twitch, skeletal muscle)                                    |
| A_23_P126582   | CASQ2   | calsequestrin 2 (cardiac muscle)                                                  |
| A_23_P134454   | CAV1    | caveolin 1, caveolae protein, 22kDa                                               |
| A_24_P12626    | CAV1    | caveolin 1, caveolae protein, 22kDa                                               |
| A_24_P251599   | CAV3    | caveolin 3                                                                        |
| A_24_P74571    | CBY1    | chibby homolog 1 (Drosophila)                                                     |
| A_23_P26928    | CCDC103 | coiled-coil domain containing 103                                                 |
| A_33_P3257594  | CCDC103 | coiled-coil domain containing 103                                                 |
| A_33_P3315949  | CCDC103 | coiled-coil domain containing 103                                                 |
| A_32_P404549   | CCDC39  | coiled-coil domain containing 39                                                  |
| A_24_P160680   | CCDC40  | coiled-coil domain containing 40                                                  |
| A_33_P3302518  | CCDC40  | coiled-coil domain containing 40                                                  |
| A_23_P115645   | CELF2   | CUGBP, Elav-like family member 2                                                  |
| A_23_P202071   | CELF2   | CUGBP, Elav-like family member 2                                                  |
| A_24_P289383   | CHD7    | chromodomain helicase DNA binding protein 7                                       |
| A_33_P3293164  | CHGA    | chromogranin A (parathyroid secretory protein 1)                                  |
| A_23_P145606   | CHRM2   | cholinergic receptor, muscarinic 2                                                |
| A_33_P3351298  | CHRM2   | cholinergic receptor, muscarinic 2                                                |
| A_23_P214969   | CITED2  | Cbp/p300-interacting transactivator, with Glu/Asp-rich carboxy-terminal domain, 2 |
| A_33_P3213374  | CITED2  | Cbp/p300-interacting transactivator, with Glu/Asp-rich carboxy-terminal domain, 2 |
| A_23_P138760   | CLCF1   | cardiotrophin-like cytokine factor 1                                              |
| A_33_P3285540  | CLDN5   | claudin 5                                                                         |
| A_33_P3775848  | CLIC2   | chloride intracellular channel 2                                                  |
| A_23_P124946   | CMYA5   | cardiomyopathy associated 5                                                       |
| A_24_P935491   | COL3A1  | collagen, type III, alpha 1                                                       |
| A_23_P81131    | CORIN   | corin, serine peptidase                                                           |
| A_23_P259442   | CPE     | carboxypeptidase E                                                                |
| A_23_P155376   | CRELD1  | cysteine-rich with EGF-like domains 1                                             |
| A_33_P3422479  | CRELD1  | cysteine-rich with EGF-like domains 1                                             |
| A_23_P44674    | CRIP1   | cysteine-rich protein 1 (intestinal)                                              |
| A_33_P3251703  | CRIP1   | cysteine-rich protein 1 (intestinal)                                              |
| A_33_P3354965  | CRIP1   | cysteine-rich protein 1 (intestinal)                                              |
| A_33_P3502315  | CRLS1   | cardiolipin synthase 1                                                            |
| A_23_P24469    | CSRP3   | cysteine and glycine-rich protein 3 (cardiac LIM protein)                         |
| A_33_P3822503  | CTF1    | cardiotrophin 1                                                                   |
| A_24_P153831   | CTNNA3  | catenin (cadherin-associated protein), alpha 3                                    |
| A_33_P3302191  | CTNNA3  | catenin (cadherin-associated protein), alpha 3                                    |
| A_23_P29495    | CTNNB1  | catenin (cadherin-associated protein), beta 1, 88kDa                              |
| A_33_P3421695  | CTNNB1  | catenin (cadherin-associated protein), beta 1, 88kDa                              |
| A_23_P57268    | CXADR   | coxsackie virus and adenovirus receptor                                           |
| A_24_P374943   | CXADR   | coxsackie virus and adenovirus receptor                                           |
| A_23_P103486   | CYP2J2  | cytochrome P450, family 2, subfamily J, polypeptide 2                             |
| A_23_P435636   | DAND5   | DAN domain family member 5, BMP antagonist                                        |
| A_23_P28466    | DAW1    | dynein assembly factor with WDR repeat domains 1                                  |
| A_23_P98645    | DCHS1   | dachsous cadherin-related 1                                                       |
| A_33_P3275801  | DES     | desmin                                                                            |
| A_23_P24129    | DKK1    | dickkopf WNT signaling pathway inhibitor 1                                        |
| A_23_P112016   | DLC1    | DLC1 Rho GTPase activating protein                                                |
| A_24_P940115   | DLC1    | DLC1 Rho GTPase activating protein                                                |
| A_23_P167920   | DLL1    | delta-like 1 (Drosophila)                                                         |
| A_23_P419641   | DLL4    | delta-like 4 (Drosophila)                                                         |
| A_23_P321860   | DMD     | dystrophin                                                                        |
| A_24_P185854   | DMD     | dystrophin                                                                        |
| A_33_P3284763  | DMD     | dystrophin                                                                        |
| A_33_P3297813  | DMD     | dystrophin                                                                        |
| A_23_P50535    | DMPK    | dystrophia myotonica-protein kinase                                               |
| A_23_P54612    | DNAAF1  | dynein, axonemal, assembly factor 1                                               |
| A_33_P3368388  | DNAAF1  | dynein, axonemal, assembly factor 1                                               |
| A_23_P255876   | DNAI1   | dynein, axonemal, intermediate chain 1                                            |
| A_33_P3304242  | DNAI1   | dynein, axonemal, intermediate chain 1                                            |
| A_33_P3733417  | DRD2    | dopamine receptor D2                                                              |
| A_22_P00005391 | DSC2    | desmocolin 2                                                                      |
| A_23_P4494     | DSC2    | desmocolin 2                                                                      |
| A_23_P141730   | DSG2    | desmoglein 2                                                                      |
| A_32_P157945   | DSP     | desmoplakin                                                                       |
| A_33_P3402565  | DSP     | desmoplakin                                                                       |
| A_23_P139704   | DUSP6   | dual specificity phosphatase 6                                                    |
| A_23_P55342    | DVL2    | dishevelled segment polarity protein 2                                            |
| A_24_P154080   | ECE1    | endothelin converting enzyme 1                                                    |
| A_24_P396375   | ECE1    | endothelin converting enzyme 1                                                    |
| A_23_P377299   | ECE2    | endothelin converting enzyme 2                                                    |
| A_23_P92261    | ECE2    | endothelin converting enzyme 2                                                    |
| A_23_P214821   | EDN1    | endothelin 1                                                                      |
| A_33_P3258392  | EDN1    | endothelin 1                                                                      |
| A_23_P312150   | EDN2    | endothelin 2                                                                      |
| A_23_P17438    | EDN3    | endothelin 3                                                                      |
| A_33_P3397288  | EDN3    | endothelin 3                                                                      |
| A_23_P113005   | EFNA1   | ephrin-A1                                                                         |
| A_24_P355944   | EFNB2   | ephrin-B2                                                                         |
| A_23_P83328    | ENG     | endoglin                                                                          |
| A_23_P168443   | EPHB4   | EPH receptor B4                                                                   |
| A_33_P3216532  | EPHB4   | EPH receptor B4                                                                   |
| A_23_P349416   | ERBB3   | erb-b2 receptor tyrosine kinase 3                                                 |
| A_33_P3211569  | ERBB3   | erb-b2 receptor tyrosine kinase 3                                                 |
| A_33_P3280471  | ERBB3   | erb-b2 receptor tyrosine kinase 3                                                 |
| A_32_P183765   | ERBB4   | erb-b2 receptor tyrosine kinase 4                                                 |
| A_33_P3211558  | ERBB4   | erb-b2 receptor tyrosine kinase 4                                                 |
| A_24_P62783    | FABP3   | fatty acid binding protein 3, muscle and heart                                    |
| A_33_P3348239  | FBN1    | fibrillin 1                                                                       |

| Systematic     | Common  | Description                                                             |
|----------------|---------|-------------------------------------------------------------------------|
| A_33_P3379886  | FGF2    | fibroblast growth factor 2 (basic)                                      |
| A_33_P3419696  | FGF2    | fibroblast growth factor 2 (basic)                                      |
| A_33_P3380797  | FGF3    | fibroblast growth factor 3                                              |
| A_24_P355720   | FGF4    | fibroblast growth factor 4                                              |
| A_23_P46829    | FGF8    | fibroblast growth factor 8 (androgen-induced)                           |
| A_23_P202334   | FGFR2   | fibroblast growth factor receptor 2                                     |
| A_23_P303145   | FGFR2   | fibroblast growth factor receptor 2                                     |
| A_24_P206624   | FGFR2   | fibroblast growth factor receptor 2                                     |
| A_23_P397238   | FKBP1A  | FK506 binding protein 1A, 12kDa                                         |
| A_24_P160001   | FKBP1A  | FK506 binding protein 1A, 12kDa                                         |
| A_32_P50522    | FKBP1A  | FK506 binding protein 1A, 12kDa                                         |
| A_33_P3227345  | FKBP1A  | FK506 binding protein 1A, 12kDa                                         |
| A_33_P3403615  | FKBP1A  | FK506 binding protein 1A, 12kDa                                         |
| A_23_P142631   | FKBP1B  | FK506 binding protein 1B, 12.6 kDa                                      |
| A_24_P236235   | FLRT2   | fibronectin leucine rich transmembrane protein 2                        |
| A_33_P3418833  | FLRT3   | fibronectin leucine rich transmembrane protein 3                        |
| A_23_P53176    | FOLR1   | folate receptor 1 (adult)                                               |
| A_32_P205110   | FOXC1   | forkhead box C1                                                         |
| A_33_P3302295  | FOXC2   | forkhead box C2                                                         |
| A_23_P118254   | FOXF1   | forkhead box F1                                                         |
| A_33_P3355503  | FOXL1   | forkhead box L1                                                         |
| A_32_P140030   | FOXN4   | forkhead box N4                                                         |
| A_23_P155257   | FOXP1   | forkhead box P1                                                         |
| A_33_P3214303  | FOXP1   | forkhead box P1                                                         |
| A_33_P3214310  | FOXP1   | forkhead box P1                                                         |
| A_33_P3228435  | FXYP1   | FXYP domain containing ion transport regulator 1                        |
| A_22_P00025271 | FXYP2   | FXYP domain containing ion transport regulator 2                        |
| A_23_P161769   | FXYP2   | FXYP domain containing ion transport regulator 2                        |
| A_33_P3228445  | FXYP2   | FXYP domain containing ion transport regulator 2                        |
| A_33_P3228450  | FXYP3   | FXYP domain containing ion transport regulator 3                        |
| A_33_P3228455  | FXYP3   | FXYP domain containing ion transport regulator 3                        |
| A_33_P3228460  | FXYP3   | FXYP domain containing ion transport regulator 3                        |
| A_33_P3228466  | FXYP3   | FXYP domain containing ion transport regulator 3                        |
| A_23_P98121    | FXYP4   | FXYP domain containing ion transport regulator 4                        |
| A_23_P150394   | FXYP6   | FXYP domain containing ion transport regulator 6                        |
| A_23_P119611   | FXYP7   | FXYP domain containing ion transport regulator 7                        |
| A_23_P153026   | GAA     | glucosidase, alpha; acid                                                |
| A_23_P8416     | GALNT11 | polypeptide N-acetylgalactosaminyltransferase 11                        |
| A_24_P374244   | GATA1   | GATA binding protein 1 (globin transcription factor 1)                  |
| A_33_P3550894  | GATA2   | GATA binding protein 2                                                  |
| A_33_P3360341  | GATA3   | GATA binding protein 3                                                  |
| A_23_P384761   | GATA4   | GATA binding protein 4                                                  |
| A_33_P3293456  | GATA4   | GATA binding protein 4                                                  |
| A_33_P3360363  | GATA4   | GATA binding protein 4                                                  |
| A_33_P3406962  | GATA4   | GATA binding protein 4                                                  |
| A_23_P371835   | GATA5   | GATA binding protein 5                                                  |
| A_23_P304450   | GATA6   | GATA binding protein 6                                                  |
| A_24_P55295    | GJA1    | gap junction protein, alpha 1, 43kDa                                    |
| A_23_P371729   | GJA5    | gap junction protein, alpha 5, 40kDa                                    |
| A_33_P3373358  | GJC1    | gap junction protein, gamma 1, 45kDa                                    |
| A_23_P209246   | GLI2    | GLI family zinc finger 2                                                |
| A_33_P3358457  | GLI2    | GLI family zinc finger 2                                                |
| A_33_P3358462  | GLI2    | GLI family zinc finger 2                                                |
| A_33_P3358469  | GLI2    | GLI family zinc finger 2                                                |
| A_24_P381029   | GLRX3   | glutaredoxin 3                                                          |
| A_23_P318284   | GPD1L   | glycerol-3-phosphate dehydrogenase 1-like                               |
| A_23_P8640     | GPHER1  | G protein-coupled estrogen receptor 1                                   |
| A_33_P3345812  | GPHER1  | G protein-coupled estrogen receptor 1                                   |
| A_33_P3345816  | GPHER1  | G protein-coupled estrogen receptor 1                                   |
| A_33_P3356752  | GPHER1  | G protein-coupled estrogen receptor 1                                   |
| A_33_P3239849  | GPX1    | glutathione peroxidase 1                                                |
| A_33_P3354322  | GPX1    | glutathione peroxidase 1                                                |
| A_23_P432947   | GREM1   | gremlin 1, DAN family BMP antagonist                                    |
| A_33_P3319870  | GREM1   | gremlin 1, DAN family BMP antagonist                                    |
| A_24_P40626    | GREM2   | gremlin 2, DAN family BMP antagonist                                    |
| A_24_P185394   | GSK3A   | glycogen synthase kinase 3 alpha                                        |
| A_23_P397208   | GSTM2   | glutathione S-transferase mu 2 (muscle)                                 |
| A_33_P3410351  | GSTM2   | glutathione S-transferase mu 2 (muscle)                                 |
| A_24_P304051   | GSTO1   | glutathione S-transferase omega 1                                       |
| A_23_P58770    | HAND1   | heart and neural crest derivatives expressed 1                          |
| A_23_P373521   | HAND2   | heart and neural crest derivatives expressed 2                          |
| A_23_P10206    | HAS2    | hyaluronan synthase 2                                                   |
| A_33_P3418681  | HCN4    | hyperpolarization activated cyclic nucleotide gated potassium channel 4 |
| A_33_P3418686  | HCN4    | hyperpolarization activated cyclic nucleotide gated potassium channel 4 |
| A_23_P210048   | HDAC4   | histone deacetylase 4                                                   |
| A_22_P00007581 | HDAC9   | histone deacetylase 9                                                   |
| A_23_P404162   | HDAC9   | histone deacetylase 9                                                   |
| A_24_P206317   | HDAC9   | histone deacetylase 9                                                   |
| A_32_P166693   | HEG1    | heart development protein with EGF-like domains 1                       |
| A_23_P6596     | HES1    | hes family bHLH transcription factor 1                                  |
| A_32_P83845    | HEY1    | hes-related family bHLH transcription factor with YRPW motif 1          |
| A_24_P363408   | HEY2    | hes-related family bHLH transcription factor with YRPW motif 2          |
| A_23_P430658   | HEYL    | hes-related family bHLH transcription factor with YRPW motif-like       |
| A_23_P142125   | HRC     | histidine rich calcium binding protein                                  |
| A_23_P103703   | HSPB7   | heat shock 27kDa protein family, member 7 (cardiovascular)              |
| A_33_P3368369  | HSPB7   | heat shock 27kDa protein family, member 7 (cardiovascular)              |
| A_23_P16953    | HTR2B   | 5-hydroxytryptamine (serotonin) receptor 2B, G protein-coupled          |
| A_23_P212447   | IFT122  | intraflagellar transport 122                                            |
| A_33_P3338698  | IHH     | indian hedgehog                                                         |
| A_23_P35684    | INPP5F  | inositol polyphosphate-5-phosphatase F                                  |
| A_33_P3237096  | INPP5F  | inositol polyphosphate-5-phosphatase F                                  |
| A_33_P3238920  | INPP5F  | inositol polyphosphate-5-phosphatase F                                  |
| A_33_P3335725  | INSR    | insulin receptor                                                        |
| A_23_P110837   | IRX4    | iroquois homeobox 4                                                     |
| A_23_P81529    | ISL1    | ISL LIM homeobox 1                                                      |
| A_23_P92042    | ITPR1   | inositol 1,4,5-trisphosphate receptor, type 1                           |
| A_22_P00008337 | ITPR2   | inositol 1,4,5-trisphosphate receptor, type 2                           |
| A_33_P3232294  | ITPR2   | inositol 1,4,5-trisphosphate receptor, type 2                           |
| A_33_P3298128  | ITPR2   | inositol 1,4,5-trisphosphate receptor, type 2                           |
| A_23_P19517    | ITPR3   | inositol 1,4,5-trisphosphate receptor, type 3                           |
| A_23_P210763   | JAG1    | jagged 1                                                                |
| A_23_P501822   | JUP     | junction plakoglobin                                                    |
| A_23_P417173   | KCNA5   | potassium channel, voltage gated shaker related subfamily A, member 5   |
| A_23_P315772   | KCND1   | potassium channel, voltage gated Shal related subfamily D, member 1     |
| A_23_P259251   | KCND2   | potassium channel, voltage gated Shal related subfamily D, member 2     |
| A_23_P692      | KCND3   | potassium channel, voltage gated Shal related subfamily D, member 3     |
| A_32_P58407    | KCND3   | potassium channel, voltage gated Shal related subfamily D, member 3     |
| A_23_P154855   | KCNE1   | potassium channel, voltage gated subfamily E regulatory beta subunit 1  |
| A_23_P120694   | KCNE2   | potassium channel, voltage gated subfamily E regulatory beta subunit 2  |
| A_23_P256641   | KCNE5   | potassium channel, voltage gated subfamily E regulatory beta subunit 5  |

| Systematic     | Common       | Description                                                                                                                |
|----------------|--------------|----------------------------------------------------------------------------------------------------------------------------|
| A_23_P168403   | KCNH2        | potassium channel, voltage gated eag related subfamily H, member 2                                                         |
| A_23_P377882   | KCNH2        | potassium channel, voltage gated eag related subfamily H, member 2                                                         |
| A_23_P30554    | KCNIP1       | Kv channel interacting protein 1                                                                                           |
| A_24_P12998    | KCNIP2       | Kv channel interacting protein 2                                                                                           |
| A_23_P356004   | KCNIP3       | Kv channel interacting protein 3, calseniin                                                                                |
| A_33_P3274194  | KCNIP4       | Kv channel interacting protein 4                                                                                           |
| A_23_P1973     | KCNJ11       | potassium channel, inwardly rectifying subfamily J, member 11                                                              |
| A_24_P339429   | KCNJ12       | potassium channel, inwardly rectifying subfamily J, member 12                                                              |
| A_23_P130764   | KCNJ14       | potassium channel, inwardly rectifying subfamily J, member 14                                                              |
| A_23_P329261   | KCNJ2        | potassium channel, inwardly rectifying subfamily J, member 2                                                               |
| A_24_P6125     | KCNJ4        | potassium channel, inwardly rectifying subfamily J, member 4                                                               |
| A_23_P126075   | KCNK1        | potassium channel, two pore domain subfamily K, member 1                                                                   |
| A_33_P3358277  | KCNK1        | potassium channel, two pore domain subfamily K, member 1                                                                   |
| A_22_P00008538 | KCNK15       | potassium channel, two pore domain subfamily K, member 15                                                                  |
| A_23_P109026   | KCNK15       | potassium channel, two pore domain subfamily K, member 15                                                                  |
| A_23_P91104    | KCNK3        | potassium channel, two pore domain subfamily K, member 3                                                                   |
| A_23_P50591    | KCNK6        | potassium channel, two pore domain subfamily K, member 6                                                                   |
| A_23_P429977   | KCNQ1        | potassium channel, voltage gated KQT-like subfamily Q, member 1                                                            |
| A_33_P3247331  | KCNQ1        | potassium channel, voltage gated KQT-like subfamily Q, member 1                                                            |
| A_24_P942630   | KDM6B        | lysine (K)-specific demethylase 6B                                                                                         |
| A_33_P3382217  | KIF3A        | kinesin family member 3A                                                                                                   |
| A_33_P3465247  | KIF3A        | kinesin family member 3A                                                                                                   |
| A_23_P120227   | LBH          | limb bud and heart development                                                                                             |
| A_33_P3364263  | LBH          | limb bud and heart development                                                                                             |
| A_33_P3364268  | LBH          | limb bud and heart development                                                                                             |
| A_24_P66337    | LCLAT1       | lysocardiolipin acyltransferase 1                                                                                          |
| A_32_P92505    | LCLAT1       | lysocardiolipin acyltransferase 1                                                                                          |
| A_33_P3349693  | LCLAT1       | lysocardiolipin acyltransferase 1                                                                                          |
| A_23_P160336   | LEFTY1       | left-right determination factor 1                                                                                          |
| A_22_P00004121 | Inc-CLCNKB-4 | Inc-CLCNKB-4.1                                                                                                             |
| A_22_P00007040 | Inc-GJA5-2   | Inc-GJA5-2.1                                                                                                               |
| A_22_P00009494 | Inc-MAG1-2   | Inc-MAG1-2.1                                                                                                               |
| A_22_P00011847 | Inc-PHOX2A-1 | Inc-PHOX2A-1.1                                                                                                             |
| A_22_P00015791 | Inc-TARBP2-1 | Inc-TARBP2-1.1                                                                                                             |
| A_22_P00018011 | Inc-ZNF18-1  | Inc-ZNF18-1.1                                                                                                              |
| A_22_P00018366 | Inc-ZWINT-5  | Inc-ZWINT-5.1                                                                                                              |
| A_33_P3335800  | LOC100128219 | uncharacterized LOC100128219                                                                                               |
| A_33_P3306948  | LRP6         | low density lipoprotein receptor-related protein 6                                                                         |
| A_33_P3388865  | LRRC10       | leucine rich repeat containing 10                                                                                          |
| A_23_P110606   | MAML1        | mastermind-like 1 (Drosophila)                                                                                             |
| A_33_P3220149  | MAML1        | mastermind-like 1 (Drosophila)                                                                                             |
| A_33_P3341676  | MEF2A        | myocyte enhancer factor 2A                                                                                                 |
| A_24_P393470   | MEF2B        | MEF2B neighbor                                                                                                             |
| A_24_P914940   | MEF2B        | MEF2B neighbor                                                                                                             |
| A_33_P3354771  | MEF2B        | MEF2B neighbor                                                                                                             |
| A_23_P320739   | MEF2C        | myocyte enhancer factor 2C                                                                                                 |
| A_23_P51679    | MEF2D        | myocyte enhancer factor 2D                                                                                                 |
| A_33_P3341656  | MEF2D        | myocyte enhancer factor 2D                                                                                                 |
| A_33_P3715177  | MEGF8        | multiple EGF-like-domains 8                                                                                                |
| A_33_P3214466  | MESP1        | mesoderm posterior basic helix-loop-helix transcription factor 1                                                           |
| A_23_P13442    | MICAL2       | microtubule associated monooxygenase, calponin and LIM domain containing 2                                                 |
| A_33_P3315190  | MICAL2       | microtubule associated monooxygenase, calponin and LIM domain containing 2                                                 |
| A_33_P3279550  | MIXL1        | Mix paired-like homeobox                                                                                                   |
| A_22_P00009972 | MKKS         | McKusick-Kaufman syndrome                                                                                                  |
| A_23_P79962    | MKKS         | McKusick-Kaufman syndrome                                                                                                  |
| A_33_P3388135  | MKKS         | McKusick-Kaufman syndrome                                                                                                  |
| A_23_P24211    | MMP21        | matrix metalloproteinase 21                                                                                                |
| A_23_P111492   | MOSPD3       | motile sperm domain containing 3                                                                                           |
| A_33_P3321946  | MOSPD3       | motile sperm domain containing 3                                                                                           |
| A_23_P117494   | MTFHD1       | methylenetetrahydrofolate dehydrogenase (NADP+ dependent) 1, methylenetetrahydrofolate cyclohydrolase, formyltetrahydrofol |
| A_23_P127385   | MYBPC3       | myosin binding protein C, cardiac                                                                                          |
| A_23_P206920   | MYH11        | myosin, heavy chain 11, smooth muscle                                                                                      |
| A_24_P70183    | MYH11        | myosin, heavy chain 11, smooth muscle                                                                                      |
| A_21_P0013396  | MYH6         | myosin, heavy chain 6, cardiac muscle, alpha                                                                               |
| A_23_P37167    | MYH6         | myosin, heavy chain 6, cardiac muscle, alpha                                                                               |
| A_24_P282383   | MYH7         | myosin, heavy chain 7, cardiac muscle, beta                                                                                |
| A_33_P3266964  | MYH7         | myosin, heavy chain 7, cardiac muscle, beta                                                                                |
| A_23_P162547   | MYL2         | myosin, light chain 2, regulatory, cardiac, slow                                                                           |
| A_24_P131646   | MYL3         | myosin, light chain 3, alkali, ventricular, skeletal, slow                                                                 |
| A_24_P151032   | MYL4         | myosin, light chain 4, alkali, atrial, embryonic                                                                           |
| A_23_P80008    | MYLK2        | myosin light chain kinase 2                                                                                                |
| A_22_P00010389 | MYLK3        | myosin light chain kinase 3                                                                                                |
| A_33_P3300217  | MYLK3        | myosin light chain kinase 3                                                                                                |
| A_24_P53241    | MYOCD        | myocardin                                                                                                                  |
| A_33_P3259042  | MYOCD        | myocardin                                                                                                                  |
| A_23_P162228   | NACA         | nascent polypeptide-associated complex alpha subunit                                                                       |
| A_22_P00010556 | NCOA6        | nuclear receptor coactivator 6                                                                                             |
| A_23_P259135   | NCOA6        | nuclear receptor coactivator 6                                                                                             |
| A_23_P140748   | NDRG4        | NDRG family member 4                                                                                                       |
| A_22_P00001222 | NDUFB2       | NADH dehydrogenase (ubiquinone) flavoprotein 2, 24kDa                                                                      |
| A_23_P130418   | NDUFB2       | NADH dehydrogenase (ubiquinone) flavoprotein 2, 24kDa                                                                      |
| A_24_P398147   | NEBL         | nebulin                                                                                                                    |
| A_33_P3244007  | NEBL         | nebulin                                                                                                                    |
| A_33_P3244013  | NEBL         | nebulin                                                                                                                    |
| A_24_P108311   | NEDD4L       | neural precursor cell expressed, developmentally down-regulated 4-like, E3 ubiquitin protein ligase                        |
| A_24_P782308   | NEDD4L       | neural precursor cell expressed, developmentally down-regulated 4-like, E3 ubiquitin protein ligase                        |
| A_33_P3391005  | NEDD4L       | neural precursor cell expressed, developmentally down-regulated 4-like, E3 ubiquitin protein ligase                        |
| A_23_P200001   | NEXN         | nexilin (F actin binding protein)                                                                                          |
| A_33_P3341429  | NEXN         | nexilin (F actin binding protein)                                                                                          |
| A_21_P0012236  | NF1          | neurofibromin 1                                                                                                            |
| A_24_P1919     | NF1          | neurofibromin 1                                                                                                            |
| A_24_P917026   | NF1          | neurofibromin 1                                                                                                            |
| A_33_P3240348  | NF1          | neurofibromin 1                                                                                                            |
| A_23_P213883   | NIPBL        | Nipped-B homolog (Drosophila)                                                                                              |
| A_33_P3299599  | NKX2-5       | NK2 homeobox 5                                                                                                             |
| A_33_P3240632  | NKX2-6       | NK2 homeobox 6                                                                                                             |
| A_33_P3391796  | NOG          | noggin                                                                                                                     |
| A_23_P204791   | NOS1         | nitric oxide synthase 1 (neuronal)                                                                                         |
| A_33_P3365167  | NOS1         | nitric oxide synthase 1 (neuronal)                                                                                         |
| A_23_P74309    | NOS1AP       | nitric oxide synthase 1 (neuronal) adaptor protein                                                                         |
| A_23_P60387    | NOTCH1       | notch 1                                                                                                                    |
| A_33_P3370424  | NOTCH1       | notch 1                                                                                                                    |
| A_23_P200792   | NOTCH2       | notch 2                                                                                                                    |
| A_33_P3258824  | NOTCH2       | notch 2                                                                                                                    |
| A_33_P3264771  | NOTO         | notochord homeobox                                                                                                         |
| A_33_P3228072  | NPHP3        | nephronophthisis 3 (adolescent)                                                                                            |
| A_33_P3228102  | NPHP3        | nephronophthisis 3 (adolescent)                                                                                            |
| A_23_P74059    | NPPA         | natriuretic peptide A                                                                                                      |
| A_33_P3323699  | NPPA         | natriuretic peptide A                                                                                                      |
| A_23_P62752    | NPPB         | natriuretic peptide B                                                                                                      |

| Systematic     | Common   | Description                                                             |
|----------------|----------|-------------------------------------------------------------------------|
| A_23_P301942   | NPPC     | natriuretic peptide C                                                   |
| A_22_P00015046 | NPR1     | natriuretic peptide receptor 1                                          |
| A_23_P147711   | NPR1     | natriuretic peptide receptor 1                                          |
| A_23_P123622   | NPR2     | natriuretic peptide receptor 2                                          |
| A_23_P69699    | NPY1R    | neuropeptide Y receptor Y1                                              |
| A_23_P58169    | NPY2R    | neuropeptide Y receptor Y2                                              |
| A_33_P3396244  | NPY2R    | neuropeptide Y receptor Y2                                              |
| A_23_P251836   | NPY5R    | neuropeptide Y receptor Y5                                              |
| A_23_P315815   | NRG1     | neuregulin 1                                                            |
| A_33_P3284345  | NRG1     | neuregulin 1                                                            |
| A_24_P135322   | NRP1     | neuropilin 1                                                            |
| A_24_P928052   | NRP1     | neuropilin 1                                                            |
| A_23_P393727   | NRP2     | neuropilin 2                                                            |
| A_24_P50801    | NRP2     | neuropilin 2                                                            |
| A_33_P3297415  | NRP2     | neuropilin 2                                                            |
| A_23_P205900   | NTRK3    | neurotrophic tyrosine kinase, receptor, type 3                          |
| A_32_P141969   | NTRK3    | neurotrophic tyrosine kinase, receptor, type 3                          |
| A_33_P3260134  | NTRK3    | neurotrophic tyrosine kinase, receptor, type 3                          |
| A_33_P3322814  | NTRK3    | neurotrophic tyrosine kinase, receptor, type 3                          |
| A_23_P300484   | OBSL1    | obscurin-like 1                                                         |
| A_33_P3241428  | OBSL1    | obscurin-like 1                                                         |
| A_24_P406601   | OLFM1    | olfactomedin 1                                                          |
| A_33_P3248354  | OLFM1    | olfactomedin 1                                                          |
| A_33_P3306749  | OLFM1    | olfactomedin 1                                                          |
| A_23_P323272   | OSR1     | odd-skipped related transcription factor 1                              |
| A_33_P3362088  | P2RX4    | purinergic receptor P2X, ligand gated ion channel, 4                    |
| A_24_P124370   | PARVA    | parvin, alpha                                                           |
| A_23_P257003   | PCSK5    | proprotein convertase subtilisin/kexin type 5                           |
| A_33_P3358731  | PCSK5    | proprotein convertase subtilisin/kexin type 5                           |
| A_33_P3358735  | PCSK5    | proprotein convertase subtilisin/kexin type 5                           |
| A_23_P74278    | PDE4B    | phosphodiesterase 4B, cAMP-specific                                     |
| A_33_P3240552  | PDE4D    | phosphodiesterase 4D, cAMP-specific                                     |
| A_33_P3389649  | PDE4D    | phosphodiesterase 4D, cAMP-specific                                     |
| A_33_P3389653  | PDE4D    | phosphodiesterase 4D, cAMP-specific                                     |
| A_33_P3389658  | PDE4D    | phosphodiesterase 4D, cAMP-specific                                     |
| A_24_P339944   | PDGFB    | platelet-derived growth factor beta polypeptide                         |
| A_23_P300033   | PDGFRA   | platelet-derived growth factor receptor, alpha polypeptide              |
| A_22_P00011688 | PDGFRB   | platelet-derived growth factor receptor, beta polypeptide               |
| A_23_P421401   | PDGFRB   | platelet-derived growth factor receptor, beta polypeptide               |
| A_32_P14610    | PDLIM5   | PDZ and LIM domain 5                                                    |
| A_33_P3278664  | PDLIM5   | PDZ and LIM domain 5                                                    |
| A_33_P3336925  | PDLIM5   | PDZ and LIM domain 5                                                    |
| A_33_P3416479  | PDK1     | phosphorylase kinase, gamma 1 (muscle)                                  |
| A_21_P0012238  | PIK3CA   | phosphatidylinositol-4,5-bisphosphate 3-kinase, catalytic subunit alpha |
| A_23_P92057    | PIK3CA   | phosphatidylinositol-4,5-bisphosphate 3-kinase, catalytic subunit alpha |
| A_33_P3304170  | PIK3CG   | phosphatidylinositol-4,5-bisphosphate 3-kinase, catalytic subunit gamma |
| A_23_P167367   | PITX2    | paired-like homeodomain 2                                               |
| A_21_P0011419  | PKD1     | polycystic kidney disease 1 (autosomal dominant)                        |
| A_23_P77502    | PKD1     | polycystic kidney disease 1 (autosomal dominant)                        |
| A_33_P3812815  | PKD1     | polycystic kidney disease 1 (autosomal dominant)                        |
| A_24_P106112   | PKD2     | polycystic kidney disease 2 (autosomal dominant)                        |
| A_33_P3405728  | PKP2     | plakophilin 2                                                           |
| A_23_P35617    | PLCE1    | phospholipase C, epsilon 1                                              |
| A_33_P3346669  | PLCE1    | phospholipase C, epsilon 1                                              |
| A_24_P414803   | PLN      | phospholamban                                                           |
| A_23_P167017   | POPDC2   | popeye domain containing 2                                              |
| A_24_P257336   | POPDC2   | popeye domain containing 2                                              |
| A_23_P59138    | POU5F1   | POU class 5 homeobox 1                                                  |
| A_24_P144601   | POU5F1   | POU class 5 homeobox 1                                                  |
| A_23_P329375   | POU6F1   | POU class 6 homeobox 1                                                  |
| A_23_P408285   | PRICKLE1 | prickle homolog 1 (Drosophila)                                          |
| A_24_P399630   | PRKACA   | protein kinase, cAMP-dependent, catalytic, alpha                        |
| A_24_P88266    | PROX1    | prospero homeobox 1                                                     |
| A_33_P3311974  | PROX2    | prospero homeobox 2                                                     |
| A_33_P3362178  | PROX2    | prospero homeobox 2                                                     |
| A_23_P98085    | PTEN     | phosphatase and tensin homolog                                          |
| A_24_P913115   | PTEN     | phosphatase and tensin homolog                                          |
| A_23_P22096    | PTK2     | protein tyrosine kinase 2                                               |
| A_23_P105436   | PTPN11   | protein tyrosine phosphatase, non-receptor type 11                      |
| A_23_P99027    | PTPN11   | protein tyrosine phosphatase, non-receptor type 11                      |
| A_24_P116710   | RAMP2    | receptor (G protein-coupled) activity modifying protein 2               |
| A_23_P111737   | RAMP3    | receptor (G protein-coupled) activity modifying protein 3               |
| A_23_P254498   | RANGRF   | RAN guanine nucleotide release factor                                   |
| A_23_P55136    | RANGRF   | RAN guanine nucleotide release factor                                   |
| A_24_P453497   | RBM20    | RNA binding motif protein 20                                            |
| A_33_P3307157  | RBM20    | RNA binding motif protein 20                                            |
| A_33_P3307163  | RBM20    | RNA binding motif protein 20                                            |
| A_23_P75283    | RBP4     | retinol binding protein 4, plasma                                       |
| A_21_P0013567  | RBPJ     | recombination signal binding protein for immunoglobulin kappa J region  |
| A_23_P29994    | RBPJ     | recombination signal binding protein for immunoglobulin kappa J region  |
| A_23_P167081   | REST     | RE1-silencing transcription factor                                      |
| A_23_P114947   | RGS2     | regulator of G-protein signaling 2                                      |
| A_33_P3304533  | RNF207   | ring finger protein 207                                                 |
| A_33_P3304538  | RNF207   | ring finger protein 207                                                 |
| A_33_P3316978  | RNF207   | ring finger protein 207                                                 |
| A_23_P80503    | ROBO1    | roundabout, axon guidance receptor, homolog 1 (Drosophila)              |
| A_23_P78867    | RYR1     | ryanodine receptor 1 (skeletal)                                         |
| A_23_P137797   | RYR2     | ryanodine receptor 2 (cardiac)                                          |
| A_33_P3251727  | RYR2     | ryanodine receptor 2 (cardiac)                                          |
| A_33_P3800734  | RYR3     | ryanodine receptor 3                                                    |
| A_23_P383227   | S100A1   | S100 calcium binding protein A1                                         |
| A_33_P3409086  | S100A1   | S100 calcium binding protein A1                                         |
| A_23_P404481   | S1PR1    | sphingosine-1-phosphate receptor 1                                      |
| A_23_P328074   | SALL1    | spalt-like transcription factor 1                                       |
| A_23_P158555   | SCN10A   | sodium channel, voltage gated, type X alpha subunit                     |
| A_23_P79015    | SCN1B    | sodium channel, voltage gated, type I beta subunit                      |
| A_32_P187571   | SCN2B    | sodium channel, voltage gated, type II beta subunit                     |
| A_33_P3394699  | SCN2B    | sodium channel, voltage gated, type II beta subunit                     |
| A_33_P3402404  | SCN3B    | sodium channel, voltage gated, type III beta subunit                    |
| A_23_P303833   | SCN4B    | sodium channel, voltage gated, type IV beta subunit                     |
| A_23_P21063    | SCN5A    | sodium channel, voltage gated, type V alpha subunit                     |
| A_24_P128233   | SCN5A    | sodium channel, voltage gated, type V alpha subunit                     |
| A_33_P3350547  | SCN5A    | sodium channel, voltage gated, type V alpha subunit                     |
| A_33_P3391455  | SCN5A    | sodium channel, voltage gated, type V alpha subunit                     |
| A_33_P3230990  | SCUBE1   | signal peptide, CUB domain, EGF-like 1                                  |
| A_33_P3417487  | SCUBE1   | signal peptide, CUB domain, EGF-like 1                                  |
| A_33_P3480395  | SCUBE1   | signal peptide, CUB domain, EGF-like 1                                  |
| A_33_P3299510  | SCX      | scleraxis basic helix-loop-helix transcription factor                   |
| A_23_P341532   | SETDB2   | SET domain, bifurcated 2                                                |
| A_33_P3327245  | SETDB2   | SET domain, bifurcated 2                                                |

| Systematic     | Common   | Description                                                                       |
|----------------|----------|-----------------------------------------------------------------------------------|
| A_32_P4595     | SGCD     | sarcoglycan, delta (35kDa dystrophin-associated glycoprotein)                     |
| A_33_P3267375  | SGCD     | sarcoglycan, delta (35kDa dystrophin-associated glycoprotein)                     |
| A_33_P3267380  | SGCD     | sarcoglycan, delta (35kDa dystrophin-associated glycoprotein)                     |
| A_23_P423237   | SGCG     | sarcoglycan, gamma (35kDa dystrophin-associated glycoprotein)                     |
| A_23_P373584   | SGCZ     | sarcoglycan, zeta                                                                 |
| A_32_P24585    | SH3PXD2B | SH3 and PX domains 2B                                                             |
| A_23_P111657   | SHH      | sonic hedgehog                                                                    |
| A_33_P3221859  | SHOX2    | short stature homeobox 2                                                          |
| A_23_P132121   | SIK1     | salt-inducible kinase 1                                                           |
| A_24_P136866   | SLC8A1   | solute carrier family 8 (sodium/calcium exchanger), member 1                      |
| A_32_P147078   | SLC8A1   | solute carrier family 8 (sodium/calcium exchanger), member 1                      |
| A_33_P3262156  | SLC8A1   | solute carrier family 8 (sodium/calcium exchanger), member 1                      |
| A_33_P3319542  | SLC8A2   | solute carrier family 8 (sodium/calcium exchanger), member 2                      |
| A_24_P167654   | SLC8A3   | solute carrier family 8 (sodium/calcium exchanger), member 3                      |
| A_24_P350683   | SLC9A1   | solute carrier family 9, subfamily A (NHE1, cation proton antiporter 1), member 1 |
| A_24_P71373    | SLC9A1   | solute carrier family 9, subfamily A (NHE1, cation proton antiporter 1), member 1 |
| A_33_P3267059  | SLC9A1   | solute carrier family 9, subfamily A (NHE1, cation proton antiporter 1), member 1 |
| A_23_P55518    | SMAD7    | SMAD family member 7                                                              |
| A_23_P70818    | SMO      | smoothened, frizzled class receptor                                               |
| A_33_P3379816  | SMYD1    | SET and MYND domain containing 1                                                  |
| A_23_P131846   | SNAI1    | snail family zinc finger 1                                                        |
| A_23_P169039   | SNAI2    | snail family zinc finger 2                                                        |
| A_24_P322709   | SNTA1    | syntrophin, alpha 1                                                               |
| A_23_P154840   | SOD1     | superoxide dismutase 1, soluble                                                   |
| A_23_P134176   | SOD2     | superoxide dismutase 2, mitochondrial                                             |
| A_23_P121795   | SORBS2   | sorbin and SH3 domain containing 2                                                |
| A_24_P140475   | SORBS2   | sorbin and SH3 domain containing 2                                                |
| A_33_P3406861  | SORBS2   | sorbin and SH3 domain containing 2                                                |
| A_24_P302584   | SOX11    | SRY (sex determining region Y)-box 11                                             |
| A_23_P82775    | SOX17    | SRY (sex determining region Y)-box 17                                             |
| A_33_P3226761  | SOX18    | SRY (sex determining region Y)-box 18                                             |
| A_24_P911676   | SOX4     | SRY (sex determining region Y)-box 4                                              |
| A_23_P26847    | SOX9     | SRY (sex determining region Y)-box 9                                              |
| A_24_P238420   | SPTBN4   | spectrin, beta, non-erythrocytic 4                                                |
| A_24_P293114   | SPTBN4   | spectrin, beta, non-erythrocytic 4                                                |
| A_33_P3401459  | SPTBN4   | spectrin, beta, non-erythrocytic 4                                                |
| A_23_P2414     | SPX      | spexin hormone                                                                    |
| A_23_P322086   | SPX      | spexin hormone                                                                    |
| A_23_P308603   | SRC      | SRC proto-oncogene, non-receptor tyrosine kinase                                  |
| A_24_P337657   | SRF      | serum response factor (c-fos serum response element-binding transcription factor) |
| A_23_P59718    | SRI      | sorcin                                                                            |
| A_23_P314755   | STC1     | stanniocalcin 1                                                                   |
| A_24_P214231   | STIL     | SCL/TAL1 interrupting locus                                                       |
| A_33_P3400477  | STIL     | SCL/TAL1 interrupting locus                                                       |
| A_23_P53162    | STIM1    | stromal interaction molecule 1                                                    |
| A_33_P3307495  | STRA6    | stimulated by retinoic acid 6                                                     |
| A_33_P3307500  | STRA6    | stimulated by retinoic acid 6                                                     |
| A_33_P3709150  | T        | T, brachyury homolog (mouse)                                                      |
| A_22_P00015733 | TAB2     | TGF-beta activated kinase 1/MAP3K7 binding protein 2                              |
| A_23_P19702    | TAB2     | TGF-beta activated kinase 1/MAP3K7 binding protein 2                              |
| A_33_P3404331  | TAB2     | TGF-beta activated kinase 1/MAP3K7 binding protein 2                              |
| A_23_P62371    | TAZ      | tafazzin                                                                          |
| A_33_P3409077  | TBC1D32  | TBC1 domain family, member 32                                                     |
| A_23_P211345   | TBX1     | T-box 1                                                                           |
| A_23_P40527    | TBX1     | T-box 1                                                                           |
| A_23_P164451   | TBX2     | T-box 2                                                                           |
| A_24_P211849   | TBX20    | T-box 20                                                                          |
| A_23_P25176    | TBX5     | T-box 5                                                                           |
| A_24_P30557    | TBX5     | T-box 5                                                                           |
| A_23_P107051   | TCAP     | titin-cap                                                                         |
| A_23_P49220    | TCF25    | transcription factor 25 (basic helix-loop-helix)                                  |
| A_24_P306561   | TCF25    | transcription factor 25 (basic helix-loop-helix)                                  |
| A_23_P366376   | TDGF1    | teratocarcinoma-derived growth factor 1                                           |
| A_23_P374695   | TEK      | TEK tyrosine kinase, endothelial                                                  |
| A_24_P79054    | TGFB1    | transforming growth factor, beta 1                                                |
| A_24_P402438   | TGFB2    | transforming growth factor, beta 2                                                |
| A_33_P3331451  | TGFBR1   | transforming growth factor, beta receptor 1                                       |
| A_23_P211957   | TGFBR2   | transforming growth factor, beta receptor II (70/80kDa)                           |
| A_33_P3313825  | TGFBR2   | transforming growth factor, beta receptor II (70/80kDa)                           |
| A_23_P200780   | TGFBR3   | transforming growth factor, beta receptor III                                     |
| A_33_P3252414  | TH       | tyrosine hydroxylase                                                              |
| A_33_P3360997  | TH       | tyrosine hydroxylase                                                              |
| A_33_P3494748  | TMEM65   | transmembrane protein 65                                                          |
| A_23_P166823   | TNNC1    | troponin C type 1 (slow)                                                          |
| A_23_P51565    | TNNI1    | troponin I type 1 (skeletal, slow)                                                |
| A_33_P3362831  | TNNI1    | troponin I type 1 (skeletal, slow)                                                |
| A_23_P24784    | TNNI2    | troponin I type 2 (skeletal, fast)                                                |
| A_23_P67453    | TNNI3    | troponin I type 3 (cardiac)                                                       |
| A_24_P415680   | TNNI3K   | TNNI3 interacting kinase                                                          |
| A_23_P34700    | TNNT2    | troponin T type 2 (cardiac)                                                       |
| A_24_P413470   | TP73     | tumor protein p73                                                                 |
| A_33_P3296831  | TP73     | tumor protein p73                                                                 |
| A_23_P206018   | TPM1     | tropomyosin 1 (alpha)                                                             |
| A_24_P44462    | TPM1     | tropomyosin 1 (alpha)                                                             |
| A_33_P3335966  | TPM1     | tropomyosin 1 (alpha)                                                             |
| A_33_P3248799  | TRDN     | triadin                                                                           |
| A_24_P28977    | TRPC1    | transient receptor potential cation channel, subfamily C, member 1                |
| A_23_P153529   | TRPM4    | transient receptor potential cation channel, subfamily M, member 4                |
| A_23_P134755   | TRPS1    | trichorhinophalangeal syndrome I                                                  |
| A_33_P3361746  | TRPS1    | trichorhinophalangeal syndrome I                                                  |
| A_23_P66110    | TSC2     | tuberous sclerosis 2                                                              |
| A_33_P3281686  | TSC2     | tuberous sclerosis 2                                                              |
| A_23_P68219    | TTN      | titin                                                                             |
| A_23_P85269    | TTN      | titin                                                                             |
| A_33_P3329428  | TTN      | titin                                                                             |
| A_33_P3329433  | TTN      | titin                                                                             |
| A_21_P0005474  | TWIST1   | twist family bHLH transcription factor 1                                          |
| A_21_P0005597  | TWIST1   | twist family bHLH transcription factor 1                                          |
| A_23_P71073    | TWIST1   | twist family bHLH transcription factor 1                                          |
| A_33_P3414591  | TWIST1   | twist family bHLH transcription factor 1                                          |
| A_33_P3282005  | VANGL2   | VANGL planar cell polarity protein 2                                              |
| A_23_P70398    | VEGFA    | vascular endothelial growth factor A                                              |
| A_24_P12401    | VEGFA    | vascular endothelial growth factor A                                              |
| A_23_P411157   | WNT1     | wingless-type MMTV integration site family, member 1                              |
| A_33_P3382588  | WNT1     | wingless-type MMTV integration site family, member 1                              |
| A_23_P102117   | WNT10A   | wingless-type MMTV integration site family, member 10A                            |
| A_23_P162322   | WNT10B   | wingless-type MMTV integration site family, member 10B                            |
| A_24_P253003   | WNT11    | wingless-type MMTV integration site family, member 11                             |
| A_23_P134601   | WNT16    | wingless-type MMTV integration site family, member 16                             |
| A_23_P59807    | WNT2     | wingless-type MMTV integration site family member 2                               |

| Systematic    | Common  | Description                                                                     |
|---------------|---------|---------------------------------------------------------------------------------|
| A_23_P130158  | WNT3    | wingless-type MMTV integration site family, member 3                            |
| A_23_P385690  | WNT3A   | wingless-type MMTV integration site family, member 3A                           |
| A_33_P3417502 | WNT3A   | wingless-type MMTV integration site family, member 3A                           |
| A_33_P3321070 | WNT4    | wingless-type MMTV integration site family, member 4                            |
| A_33_P3397525 | WNT4    | wingless-type MMTV integration site family, member 4                            |
| A_33_P3341499 | WNT5A   | wingless-type MMTV integration site family, member 5A                           |
| A_23_P53588   | WNT5B   | wingless-type MMTV integration site family, member 5B                           |
| A_23_P119916  | WNT6    | wingless-type MMTV integration site family, member 6                            |
| A_23_P258410  | WNT7A   | wingless-type MMTV integration site family, member 7A                           |
| A_24_P911607  | WNT7B   | wingless-type MMTV integration site family, member 7B                           |
| A_33_P3248903 | WNT7B   | wingless-type MMTV integration site family, member 7B                           |
| A_33_P3256920 | WNT7B   | wingless-type MMTV integration site family, member 7B                           |
| A_23_P58854   | WNT8A   | wingless-type MMTV integration site family, member 8A                           |
| A_23_P52430   | WNT8B   | wingless-type MMTV integration site family, member 8B                           |
| A_33_P3384058 | WNT9A   | wingless-type MMTV integration site family, member 9A                           |
| A_23_P89587   | WNT9B   | wingless-type MMTV integration site family, member 9B                           |
| A_23_P116280  | WT1     | Wilms tumor 1                                                                   |
| A_23_P108743  | XIRP2   | xin actin-binding repeat containing 2                                           |
| A_23_P393163  | XIRP2   | xin actin-binding repeat containing 2                                           |
| A_24_P33444   | YWHAE   | tyrosine 3-monooxygenase/tryptophan 5-monooxygenase activation protein, epsilon |
| A_33_P3407636 | YWHAE   | tyrosine 3-monooxygenase/tryptophan 5-monooxygenase activation protein, epsilon |
| A_33_P3214720 | ZC3H12A | zinc finger CCCH-type containing 12A                                            |
| A_33_P3311979 | ZFPM1   | zinc finger protein, FOG family member 1                                        |
| A_21_P0014737 | ZFPM2   | zinc finger protein, FOG family member 2                                        |
| A_23_P168909  | ZFPM2   | zinc finger protein, FOG family member 2                                        |
| A_23_P327910  | ZIC3    | Zic family member 3                                                             |
| A_33_P3250861 | ZIC3    | Zic family member 3                                                             |
